# Supplementary material for: An in-depth mechanistic study of the p-hydroxyphenylglycine synthetic process using in situ ATR-IR spectroscopy
Source: Royal Society of Chemistry journal article supplement (doi:10.1039/d2ay00706a), 2022-01-01
Supplement: d2ay00706a1.pdf [file d2ay00706a1.pdf]

# Supporting Information

## An in-depth Mechanistic Study and Process Understanding of p-hydroxyphenylglycine Synthesis with *in-situ* ATR-IR

Hai-Fang Mao, Hui-Min Xing, Miao-Miao Jin, Ji-Bo Liu, Yue-Liang Yao, Yun Zhao\*  
Shanghai Institute of Technology, No.100 Haiquan Road, Shanghai, 201418, China.

Corresponding author's email: [zhaoyun@sit.edu.cn](mailto:zhaoyun@sit.edu.cn) (Yun Zhao)

### 1 Experimental sections

#### ESI 1: Exploration of reaction sequence

##### Step 1: Reaction of phenol with glyoxylic acid

44.8 g distilled water and 29.6 g glyoxylic acid were added into a 250 mL four-mouth flask, then 18.8 g phenol was added into the reaction system. Raised the temperature to 28 °C and stirred for 22 h.

##### Step 2: Reaction of phenol with sulfamic acid

44.8 g distilled water and 21.9 g sulfamic acid were added into a 250 mL four-mouth flask, then 18.8 g phenol was added into the reaction system. Raised the temperature to 28 °C and stirred for 22 h.

##### Step 3: Reaction of sulfamic acid with glyoxylic acid

44.8 g distilled water and 29.6 g glyoxylic acid were added into a 250 mL four-mouth flask, then 21.9 g sulfamic acid was added into the reaction system. Raised the temperature to 28 °C and stirred for 22 h.

#### ESI 2: Redox titration of glyoxylic acid

Scheme S1. Principle of REDOX titration

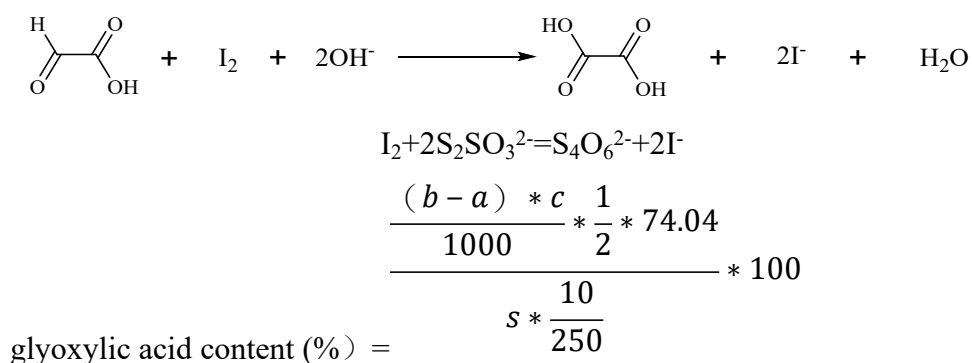

Where:  $a$  is the amount of  $\text{Na}_2\text{S}_2\text{O}_3$  solution required by the reactant, mL;  $b$  is the amount of  $\text{Na}_2\text{S}_2\text{O}_3$  solution required for blank experiment, mL;  $c$  is the molar concentration of  $\text{Na}_2\text{S}_2\text{O}_3$  solution, mol/L;  $s$  is amount of reaction product, g.

### ESI 3: Synthesis process of p-HPG

#### Step 1: The first stage (lower temperature stage)

44.8 g distilled water and 29.6 g glyoxylic acid were added into a 250 mL four-mouth flask, then 21.9 g sulfamic acid and 18.8 g phenol were added into the reaction system. Raised the temperature to 28 °C and stirred for 22 h.

#### Step 2: The second stage (higher temperature stage)

After the first step, raised the temperature to 76 °C and reacted for another 6 h.

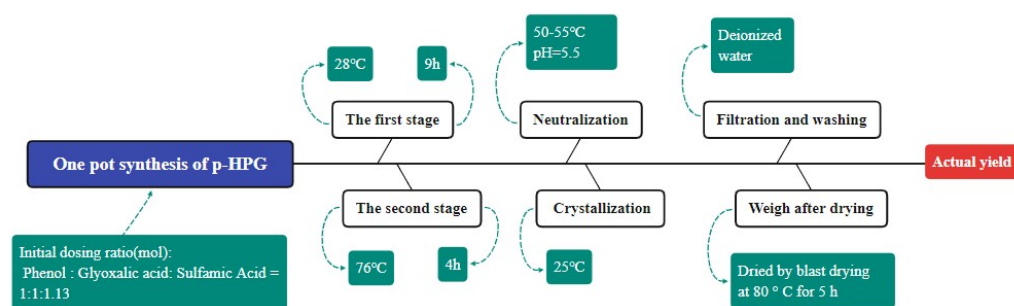

$$\text{Yield} = \frac{p - \text{HPG mass after drying/g} \times \text{purity}}{\text{Theoretically deserved } p - \text{HPG quality/g}} \times 100\%$$

### ESI 4: $\text{BaSO}_4$ precipitation experiments

#### 1: $\text{BaSO}_4$ Precipitation produced in sulfamic acid-glyoxylic acid system along with time (corresponding to Fig. 2)

44.8 g distilled water and 29.6 g glyoxylic acid were added into a 250 mL four-mouth flask, then 21.9 g sulfamic acid was added into the reaction system. Raised the temperature to 28 °C and stirred for 22 h. Took samples every 2 h, added excess  $\text{BaCl}_2$  solution to the samples, and weighted the amount of  $\text{BaSO}_4$  precipitation produced. Pure sulfamic acid and glyoxylic acid were used as blank.

#### 2: Influence of temperature on $\text{BaSO}_4$ precipitation in different reaction solution system (corresponding to Fig. 5)

44.8 g distilled water and 29.6 g glyoxylic acid were added into a 250 mL four-mouth flask, then 21.9 g sulfamic acid was added into the reaction system. Heated up the mixture to different temperature to let each mixture react for 2 h. Then  $\text{BaCl}_2$  solution was added to each sample, and the amount of  $\text{BaSO}_4$  precipitation in the samples was weighted. Pure sulfamic acid and glyoxylic acid were used as blank.

### 3: BaSO<sub>4</sub> precipitation produced during the synthetic process of p-HPG with temperature stepped mode (corresponding to Fig. S6)

44.8 g distilled water and 29.6 g glyoxylic acid were added into a 250 mL four-mouth flask, then 21.9 g sulfamic acid and 18.8 g phenol were added into the reaction system. Raised the temperature to 28 °C and stirred the reaction liquid for 22 h. After the first step, raised the temperature to 76 °C and continued the reaction for 6 h. During the whole synthetic process, took samples every 2 h, added excess BaCl<sub>2</sub> solution, and weighted the amount of BaSO<sub>4</sub> precipitation in the samples. Pure sulfamic acid and glyoxylic acid were used as blank.

### ESI 5: Impurity verification experiment (corresponding to Fig. S8)

22.4 g distilled water and 14.8 g glyoxylic acid were added into a 100 mL three-mouth flask, then 9.4 g phenol was added into the reaction system. Raised the temperature to 76 °C and stirred the reaction liquid for 5 h.

### ESI 6: Experimental conditions of HPLC analysis

All the experimental conditions for HPLC tests were the same during the whole work.

Chromatographic column: C18 column (4.6 mm×250 mm, 5 μm)

Column temperature: 25 °C

Detection wavelength: 254 nm

Injection volume: 10 μL

Mobile phase:

A---Acetonitrile (HPLC);

B---Methanol (HPLC);

C---Water (Containing 0.1% phosphoric acid);

Gradient elution method was adopted (see the table below):

| Time/min | Flow/(mL/min) | A/%  | B%   | C%    |
|----------|---------------|------|------|-------|
| 0.000    | 0.500         | 0.0  | 10.0 | 90.0  |
| 5.000    | 0.500         | 0.0  | 10.0 | 90.0  |
| 10.000   | 0.500         | 0.0  | 0.0  | 100.0 |
| 10.000   | 1.000         | 30.0 | 0.0  | 70.0  |
| 15.000   | 1.000         | 50.0 | 0.0  | 50.0  |
| 20.000   | 1.000         | 0.0  | 10.0 | 90.0  |
| 30.000   | 1.000         | 0.0  | 10.0 | 90.0  |

## 2 Supporting Figures

**Fig. S1** HPLC sample diagram of holding phenol and glyoxylic acid mixture at 28 °C

for 22 h.

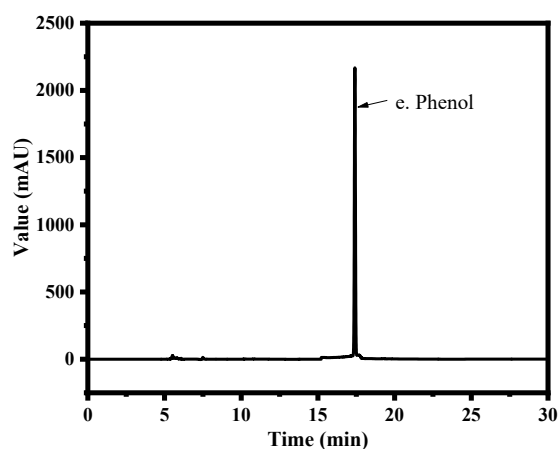

Fig. S1. HPLC sample diagram after holding phenol and glyoxylic acid mixture at 28 °C for 22 h.

**Fig. S2** HPLC sample diagram of holding phenol and sulfamic acid mixture at 28 °C for 22 h.

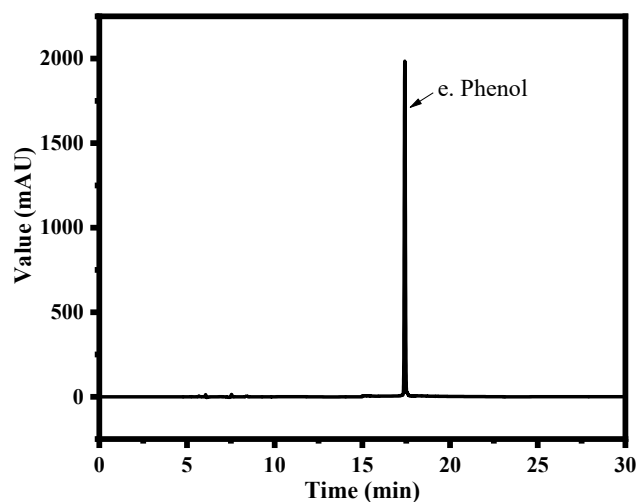

Fig. S2. HPLC sample diagram of holding phenol and sulfamic acid mixture at 28 °C for 22 h.

**Fig. S3** Infrared spectrum and HPLC diagram of the standards.

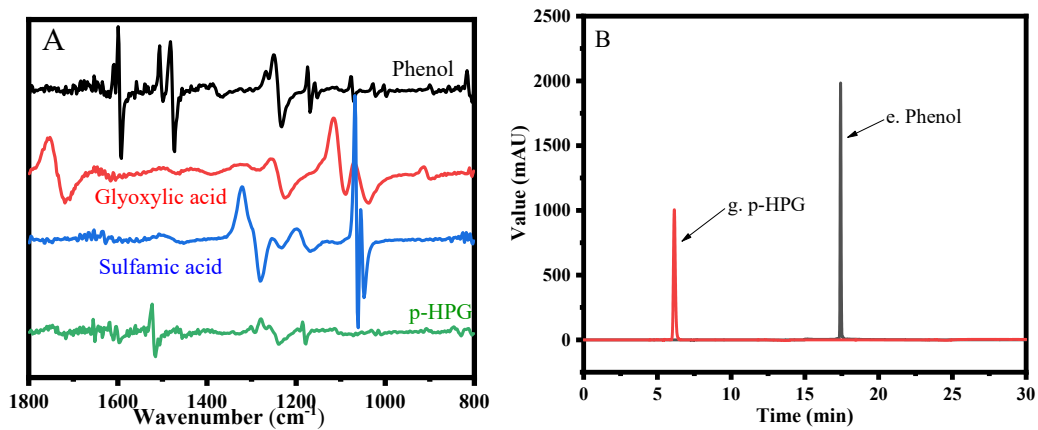

Fig. S3. (A) First derivative FT-IR spectra for standards; (B) HPLC plot.

**Fig. S4** Monitoring the reaction process of sulfamic acid-glyoxylic acid-phenol from low temperature to high temperature by HPLC.

The mixture of sulfamic acid, glyoxylic acid and phenol was reacted at 28 °C for 22 h and then was heated to 76 °C for another 6-hour reaction. HPLC results showed that a large amount of new intermediate (7.39 min, referred to **f**) was generated after reaction at 28 °C, and it was then transformed into p-HPG (6.12 min) when the temperature was raised to 76 °C.

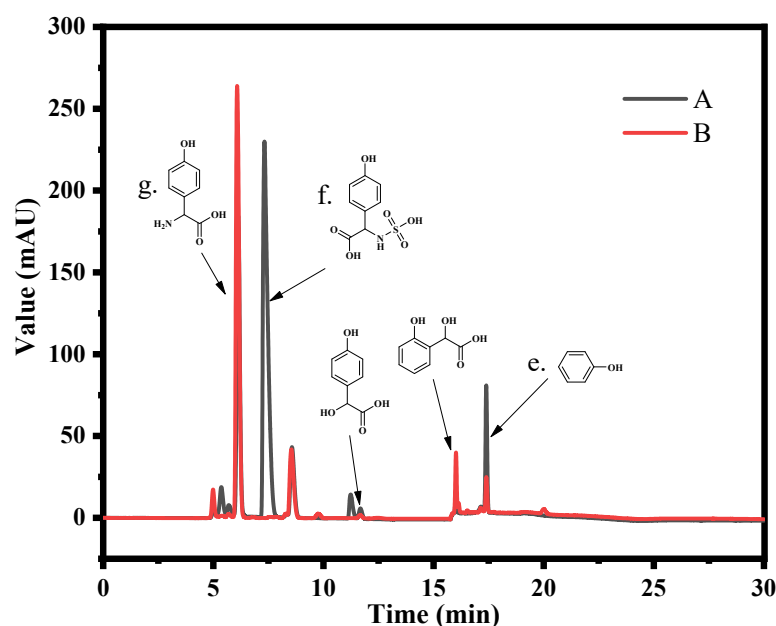

Fig. S4. HPLC sample map of sulfamic acid-glyoxylic acid-phenol reaction liquid at low temperature (black line, 28 °C) and then at high temperature (red line, 76 °C).

**Fig. S5** <sup>1</sup>HNMR characterization of the conversion of **f** to **g**

The reaction solution (including 68 % **f** and 10 % p-HPG) after the first stage (reaction at 28 °C) was separated by preparative liquid chromatography to obtain the enrichment solution containing only **f** and p-HPG. In order to avoid bringing in more impurities, the reaction liquid was not quenched. The column temperature of preparative liquid chromatography was 25 °C. The enrichment solution was freeze-dried then. The freeze-dried enrichment solution contained 55 % **f** and 45 % p-HPG (part of **f** converted to p-HPG during separation process). The freeze-dried concentrate was dissolved in heavy water and treated in batches. Among which, part A was directly characterized by <sup>1</sup>HNMR; Part B was heated to 76 °C for 2 h, and then cooled for <sup>1</sup>HNMR characterization; And meanwhile, an appropriate amount of pure p-HPG was added to

part A for nuclear magnetic characterization (labelled as C); Finally, the p-HPG standard was also characterized by  $^1\text{H}$ NMR (labelled as D).

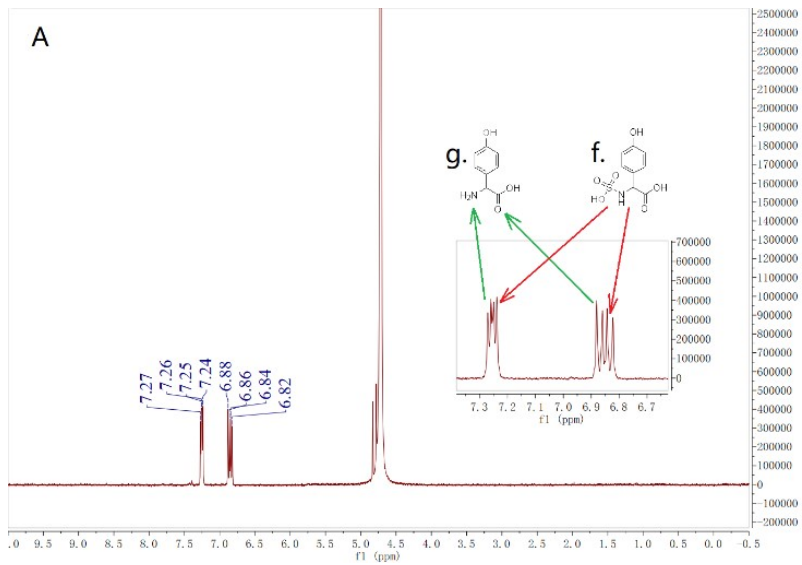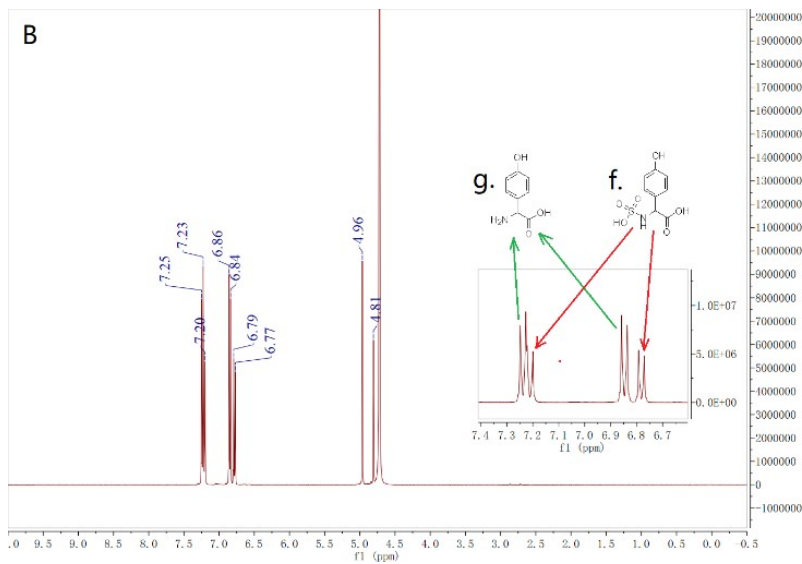

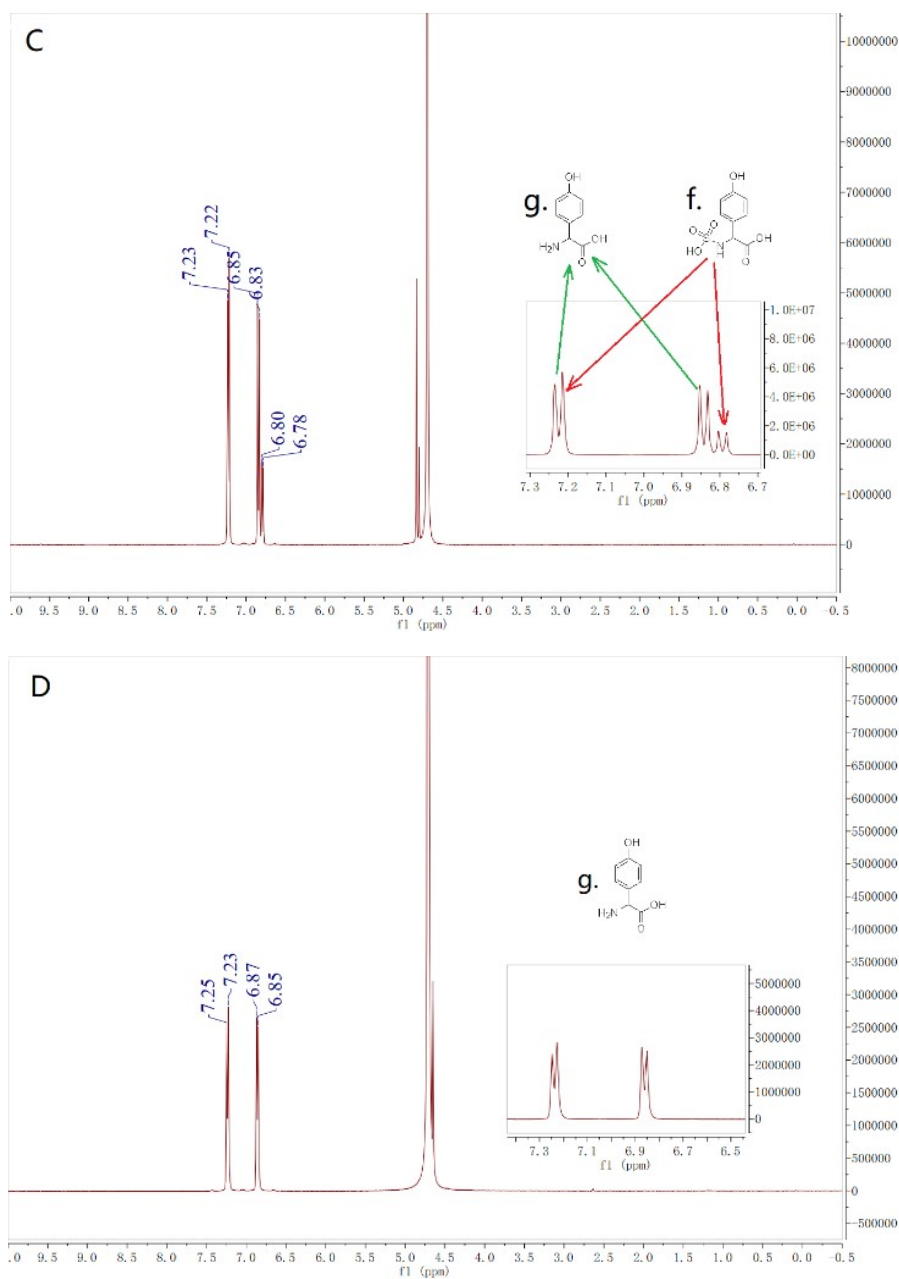

Fig. S5. <sup>1</sup>H NMR of enrichment solution treatment, (A) sample after lyophilization; (B) sample after high temperature treatment of A; (C) sample in which appropriate amount of pure p-HPG was added into A; (D) p-HPG standard.

**Fig. S6** Precipitation experiments

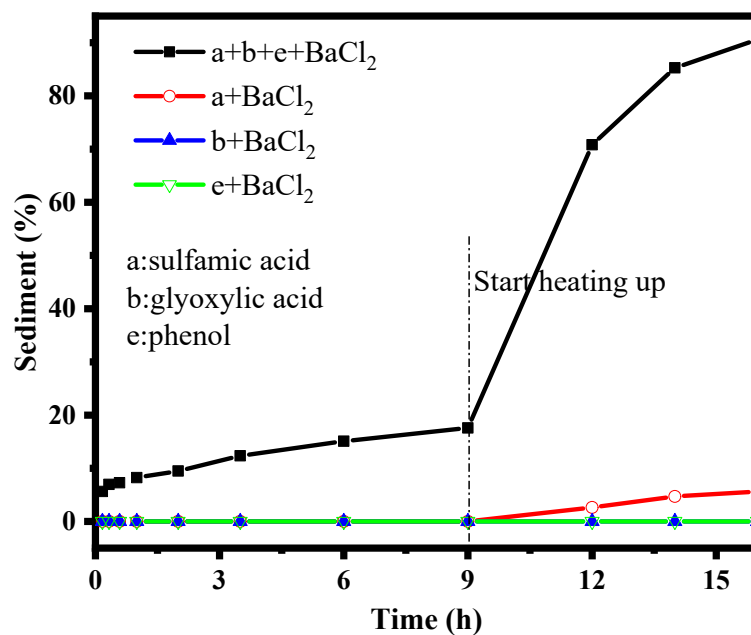

Fig. S6. Variation of precipitation amount with time during the reaction of sulfamic acid (a) - glyoxylic acid (b) - phenol (e) from low temperature to high temperature.

For sulfamic acid-glyoxylic acid-phenol system, the amount of BaSO<sub>4</sub> precipitation increased sharply with the increase of temperature, indicating that higher temperature favored the dissociation of sulfonate of f. In other words, higher temperature would accelerate the conversion of intermediate f to p-HPG.

**Fig.S7** HPLC monitoring of the reaction process of sulfamic acid-glyoxylic acid at 76 °C (reacting the mixture for 2 h then adding phenol).

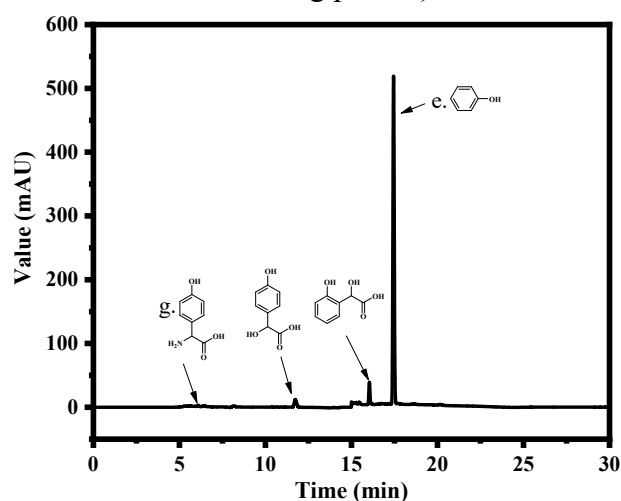

Fig.S7. HPLC monitoring of the reaction process of sulfamic acid-glyoxylic acid at 76 °C (reacting the mixture for 2 h then adding phenol).



**Fig. S8** HPLC monitoring of the reaction process of glyoxylic acid-phenol at 76 °C for 5 h.

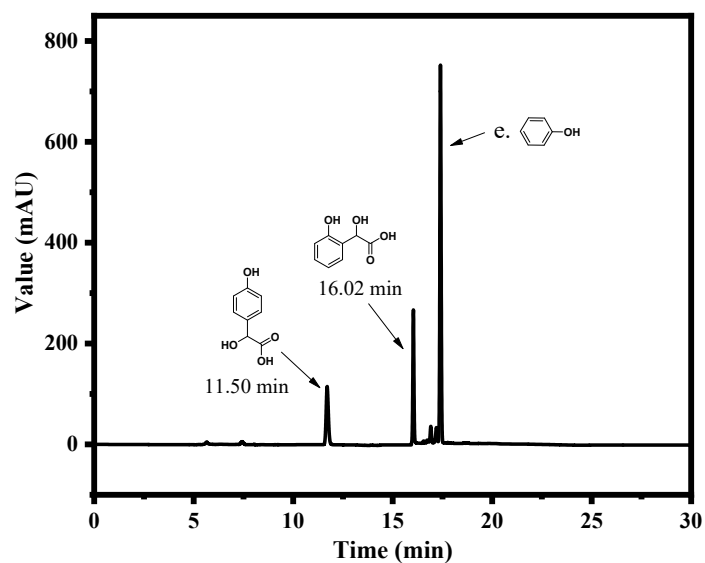

Fig. S8. HPLC monitoring of the reaction process of glyoxylic acid-phenol at 76 °C for 5 h.

**Fig. S9** The influence of temperature of the first stage on the product yield.

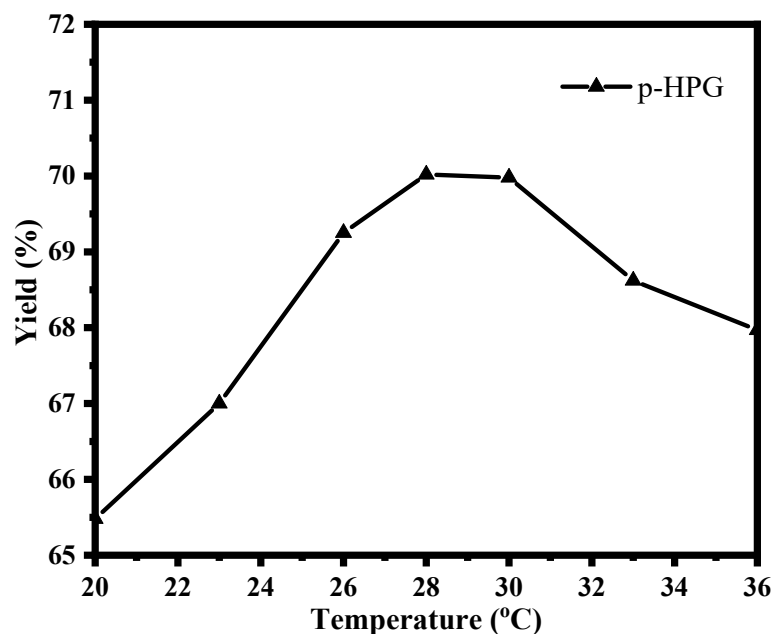

Fig. S9. The influence of temperature of the first stage on the product yield.

**Fig. S10** The influence of temperature of the second stage on the product yield.

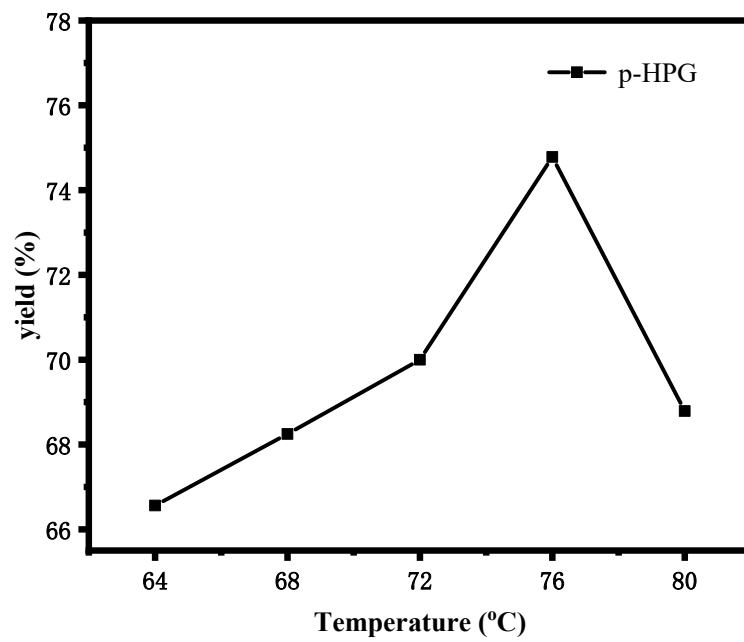

Fig. S10. The influence of temperature of the second stage on the product yield.
